# Supplementary material for: Treatment of Androgenetic Alopecia Using PRP to Target Dysregulated Mechanisms and Pathways
Source: Front Med (Lausanne). 2022 Mar 16;9:843127. doi: 10.3389/fmed.2022.843127 (PMC8965895; doi:10.3389/fmed.2022.843127)
Supplement: Supplementary file 1 [file Table_1.XLSX]

## Sheet: Study Description
	Study Type
Study	Randomized?	Controlled?	Blinded?	Half-head/Cross-over?	Subject Characteristics	Objective Measures	Objective Assessment	Subjective Measures	Subjective Assessment
Qu et al. (98)	Yes	Yes	Double	Half-head	Inclusion criteria: 32 male AGA patients (stage II–V, Norwood-Hamilton classification scale) and 20 female AGA patient (stage I–III, Ludwig classification) Exclusion criteria: Patients that use any therapeutics targeting AGA (finasteride, dutasteride, minoxidil) in the previous 1 year and patients with immunosuppression, hematological disorders, and autoimmune disorders	Standardized TrichoScan Analysis and global macroscopic photographs 1. Mean hair count 2. Hair density 3. Hair diameter 4. Anagen hairs ratio 5. Assessment of macrographs by 5 independent observers using a 5 point scale from 0 (much severer) to 5 (much better)	1. Mean hair count: Improved at 3 and 6 mo when compared to baseline (p<0.05). Improved when compared to control at 6 mo (p<0.05). 2. Hair density: Improved at 3 and 6 mo when compared to baseline (p<0.05). Improved when compared to control at 3 mo (p<0.001) 3. Hair diameter: Improved at 3 and 6 mo when compared to baseline (p<0.05). Improved when compared to control at 6 mo (p<0.05). 4. Anagen h…	Satisfaction questionnaires (5-point scale).	The mean satisfaction scores across the entire study period was 4.23
Ramadan et al. (102)	Yes	Yes	Single	None	Inclusion criteria: 46 males and 80 females aged 23 to 47 years. The degree of MPHL ranged from stage II to stage IV according to the Norwood-Hamilton classification, while FPHL ranged from stage I to stage III according to the Ludwig's classification. 84/126 pts were administered PRP Exclusion criteria: pregnancy, breastfeeding, systemic disease, or immunosuppression	1. Pull test 2. Hair density by Dermoscopy 3. Hair diameter by Dermoscopy 4. Photography by I phone 6 + camera 5. The clinical improvement was evaluated by three blinded dermatologists	1. Pull test: After 6 months, became negative in over 95% of patients 2. Hair density: No, p = 0.092 in Group I. Yes, p<0.001 in Group II (compared to control) 3. Hair diameter: No, p = 0.129 in Group I. Yes, p<0.001 in Group II (compared to control) 5. Clinical improvement evaluation: Group I yes, p<0.001. Group II yes, P<0.001 (compared to control)	Patient satisfaction was reported as a verbal questioner based on quality of life measurement.	88% (111/126)] were satisfied by the results at 3rd month (after 3 sessions) and encouraged to continue treatment sessions. They were greatly satisfied after 6 months.
Dubin et al. (97)	Yes	Yes	Yes	None	Inclusion criteria: 30 women were randomized into a treatment group (15 patients receiving PRP injections) or control group (15 patients receiving saline). Ludwig I-III. 1 pt lost to follow up in each group Exlusion criteria: Any use of minoxidil, finasteride, or spironolactone within the prior 12 months and for the duration of the study, other causes of alopecia and abnormal ferritin levels, thy…	1. Hair density 2. Hair caliber 3. Blinded global photographic assessment	1. Hair density: Compared to baseline, improvement week 8 and 24 p<0.01 (PRP vs placebo). Sustained improvement at week 24 2. Hair caliber: Compared to baseline, improvement at weeks 8 and 24 p<0.01 (PRP vs placebo) 3. Blinded photographic assessment: 57% of PRP group patients improved from baseline at week 24	None	N/A
Gentile et al. (94)	Yes	Yes	Yes	Half-head (placebo placed in appropriate area, did not occupy half scalp)	Inclusion criteria: 90 patients, 63 males showing AGA in stage I–V by the Norwood–Hamilton scale and 27 females with AGA in stage I–III by the Ludwig scale. 57 patients were treated with A-PRP (nonactivated) injections and 33 patients were treated with AA-PRP (autologous activated). Of the 90 patients enrolled, 3 were excluded and 1 was rejected. Exclusion criteria: Platelet disorders, thrombocyt…	Trichospic photomicrograph (hair growth)#1-5 1. Hair count 2. Hair diameter 3. Hair thickness 4. Anagen to telogen ratio 5. Vellus to terminal hair ratio	Hair diameter: Improvement seen in both A-PRP and AA-PRP when compared to control, p<0.0001 at 58 wks. Improvement in HD measurements for patients treated with A-PRP and AA-PRP were 23 ± 3 and 13 ± 3 hairs/cm2 at 58 weeks There were no statistically significant differences in vellus HD between the study and the control area Combined use of A-PRP with micro-needling: Increase in hair density compa…	None	N/A
Bayat et al. (95)	Yes	Yes	N/A	None	Inclusion criteria: 19 patients with grade III vertex to grade V androgenetic alopecia Exclusion criteria: Use of topical and systemic medications in the treatment of androgenetic alopecia or retinoids and corticosteroids in last 6 months, thyroid or collagen vascular diseases, receiving chemotherapy, other types of alopecia, bleeding disorders, smoking, alcohol consumption, and malnutrition	Dermoscopy photos evaluated by a dermatologist (#1-2) 1. Number of hair follicles in area unit 2. Average of hair thickness in area unit 3. Clinical changes assessment between the initial evaluation and final follow-up by two independent observers (Jaeschke et al scoring system)	1. Number of hair follicles in area unit: Improved, p<0.05 2. Average of hair thickness in area unit: Improved, p<0.001, throughout study period and by 3 months after the last injection 3. Clincal changes assessment: Mean clinical rating by the first and second evaluators was 3.42 ± 1.54 and 2.21 ± 2.70, respectively	None	N/A
Butt et al. 2019 (96)	N/A	Yes	N/A	None	Inclusion criteria: 30 volunteers (20 males and 10 females) with AGA. Males type III to VI on Hamilton-Norwood scale and females type I to III on Ludwig classification Exclusion criteria: Pregnancy, chronic disease like diabetes, malignancy, thinning of scalp hair globally also in occipital areas, inflammation of the scalp or any type of infection on scalp, and anticoagulant medication for the la…	Trichospic photomicrograph #1-2 1. Mean hair density 2. Terminal to vellus hair ratio 3. Pull test 4. Macroscopic photographs 5. Physician global assessment score	1. Mean hair density: Improved by 6 months p<0.05 2. Terminal to vellus hair ratio: In 60% of the patients, terminal to vellus hair ratio increased while it remained static in other patients 3. Pull test: Improved by 6 months p<0.05 5. PhGAS: Improvement in hair growth p<0.05	Patient global assessment score	Improvement in hair growth (p<0.05)
Rodrigues et al. (93)	Yes	Yes	Double	None	Inclusion criteria: 26 patients included. AGA-III-vertex profile according on the Norwood-Hamilton scale. These patients were randomized into 2 groups: a treatment group treated with application of PRP and a control group treated with application of saline solution. Exclusion criteria: female sex; previous hair transplantation; history of any disease related to hair loss, such as thyroid disease …	Trichospic photomicrograph #1-3 1. Hair count 2. Hair density 3. Terminal to vellus hair ratio 4. Anagen percentage 5. Telogen percentage	1. Hair count: Significantly improved compared to baseline 3 months after the last treatment 2. Hair density: Improved, p=0.012 compared to baseline 3 months after the last treatment 3. Terminal to vellus hair ratio: No improvement in either group, p=0.955 for PRP group 4. Anagen percentage: Improvement not maintained 5. Telogen percentage: Improvement not maintained	None	N/A
Hausauer et al. (92)	Yes	Yes	Single	None	Inclusion criteria: 30 men and 10 women aged 18 to 60 years with AGA, disease stages Norwood-Hamilton II–V and Ludwig I2–II1, respectively. (39 completed protocol- 20 in Group 1 and 19 in Group 2) Exclusion criteria: Diagnosis of non-AGA hair loss; active skin disease, infection, cuts, or abra- sions on the scalp; history of surgical hair restoration; current or recent malignancy, excluding non-s…	Folliscope and global photography 1. Hair count 2. Shaft caliber 3. Norwood–Hamilton or Ludwig scale were determined	1. Hair count: At 3 months, only group 1 showed improvement. At 6 months, both group 1 and 2 showed improvement, p<0.001 (compared to baseline). When comparing absolute and percent change between groups, the Group 1 protocol yielded superior results, p<0.001. No difference in the increases seen among men and women (p = .78) 2. Shaft caliber: Improved at 3 and 6 months irrespective of group (p < .…	Rating satisfaction on a 4-point scale (3 = highly satisfied, 2 = satisfied, 1 = dissatisfied, and 0 = highly dissatisfied).	At 6 months, 82% of participants reported being “satisfied” or “highly satisfied." Mean satisfaction score across the entire study period was 2.3 (Group 1, 2.5; Group 2, 2.1).
Pakhomova et al. (101)	Yes	Yes	Single	None	Inclusion Criteria: 69 men aged 18-53 with I-IV AGA (Norwood-Hamilton Scale) Exclusion criteria: VI AGA or higher, lab-confirmed hyperandrogenism, inflammatory processes on scalp, use of other hair growth stimulators (finasteride/dutasteride), taking aspirin or platelet-lowering medications, leukocytosis/thrombocytopenia in blood tests, tendency to form keloids or hypertrophic scars	TrichoSciencePro v 1.3RUS analysis of trichoscopy and phototrichogram 1. Hair Density on 1 cm^2 2. Share of vellus hair (%) 3. Average diameter of all hair in um 4. Share of telogen hair (%) 5. Ki67 index 6. area of CD34 expression 7. area of B-catenin expression	1. Hair Density - Group 1: + 12% (0.000067), Group 2: + 32% (0.00004), Group 3: + 16% (0.00073), Group 2 vs 1 (0.0001), Group 2 vs 3 (0.0347) 2. Velus Hair % - Group 1: -17% (0.0022), Group 2: -30% (0.00082), Group 3: non-significant, Group 1 vs 3 (0.0069), Group 2 vs 3 (0.0009) 3. Average Diameter - Group 1: +12% (0.00195), Group 2: +26% (0.00004), Group 3: non-significant, Group 1 vs 3 (0.0248)…	None	N/A
Singh et al. (100)	Yes	Yes	Double	None	Inclusion Criteria: 80 men aged 18-60 with II-IV AGA (Norwood-Hamilton Scale) Exclusion criteria: Any finasteride or minoxidil use within 6 months, inflammatory processes on scalp, scarring over scalps, taking aspirin or platelet-lowering medications, taking anticoagulants, taking antihypertensives, taking anticonvulsants, with or prior history of malignancies, platelet or bleeding disorders, bon…	Analysis of dermatoscopic pictures. 1. Hair Density on 1 cm^2 area 10 cm above and 3 cm front from upper end of right tragus	1. Time to improved hair density - Group 1: increased density at 3 months (0.001), Group 2: increased density at 1 month (0.001), Group 4: increased density at 1 month (0.001) 2. End of study comparison - Group 2 > Group 1 (0.015), Group 1 > Group 3 (0.002), Group 2 > Group 3 (0.001), Group 4 > Group 3 (0.001), Group 1 vs Group 4 no difference, Group 2 vs Group 4 no difference 3. Maximum hair den…	Patient Assessment of hair density improvement: 0 = none, 1 = 1-25%, 2 = 26-50%, 3 = 51-75%, 4 = 76-100%	Patient satisfaction: Group 2 > Group 4 > Group 1,, no improvement for Group 3
Alves et al. (99)	Yes	Yes	Double	Half-head	Inclusion Criteria: healthy male patients with II-V AGA (Hamilton-Norwood Scale), healthy female with I-III AGA (Ludwig Classification) Exclusion criteria: Any finasteride or minoxidil use within 6 months to 12 months	1. Hair Count (Hairs/0.65 cm^2) 2. Hair Density on 1 cm^2 3. Terminal Hair Density 4. Anagen hair (%) 5. Telogen hair (%) 6. Anagen/telogen ratio (%)	1. Hair Count - PRP (+ topical minoxidil or oral finasteride): increased at 3 and 6 months (<0.05), Placebo (+ topical minoxidil or oral finasteride): not significant, PRP vs Placebo: increased at 6 months (<0.05), PRP + topical minoxidil vs PRP + oral finasteride: increased at 6 months (0.015) 2. Hair density - PRP: increased at 3 and 6 months (<0.05), Placebo: not significant, PRP vs Placebo: i…	None	N/A
Bruce et al. (103)	Yes	Yes	N/A	Cross-over	Inclusion Criteria: 20 women aged 18 or older with I-II AGA (Ludwig Classification Scale), 6 months of stable birth control for premenopausal women Exclusion criteria: Any finasteride/minoxidil/prostaglandin/retinoids/corticosteroids use within 3 months, bone marrow aplasia, platelet disorders, taking anticoagulants, taking anti-platelets (i.e. aspirin), uncompensated diabetes/sepsis/malignancy, …	TrichoScan Analysis 1. Hair Count (Hairs/0.6 cm^2) 2. Vellus hair Density on 1 cm^2 3. Terminal Hair Density on 1 cm^2 4. Cumulative thickness (sum of thickness of each hair)	[12 weeks vs baseline] 1. Hair Count - Arm A: increased 7.7% (0.002), Arm B: increased 22.7% (<0.001), % change Arm B > Arm A (0.009) 2. Vellus Hair Density - Arm A: increased 25.7% (0.009), Arm B: increased 18.6% (0.03), % change Arm A vs Arm B: no significant change 3. Terminal Hair Density - Arm A: no significant change, Arm B: increased 12.8% (0.004), % change Arm B > Arm A (0.003) 4. Cumulat…	16-item quality of life (QOL) questionnaire at 12 weeks; 7-item personal impression of hair growth questionnaire at 12 weeks	QOL: No significant difference between Arm A and Arm B Personal Impression: No significant difference between Arm A and Arm B.
Kapoor et al. (107)	Yes	Yes	Single	None	Inclusion Criteria: 50 men aged 25-50 with II-IV AGA (Norwood-Hamilton Scale) who have not responded to minoxidil or oral finasteride for 1 year Exclusion criteria: history of hair loss < 6 months, patients with serious drug allergy, with or suspected of malignancies, autoimmune or hematologic disorders, seborrheic dermatitis, recent start or stop of any finasteride or minoxidil use	Trilogic company, Tricho software videomicroscopic assessment 1. Hair pull test at 6 and 12 months 2. Hair Counts (within 1 cm^2) at 12 months 3. hair density (per cm^2) at 12 months 4. terminal hair density (per cm^2) at 12 months 5. vellus hair density (per cm^2) at 12 months 6. shaft diameter (um) at 12 months 7. Photographic assessment of head (0 = no improvement, 10 = maximal improvement)	1. Hair Pull Test - Group A: 80% reduction by 6 months and 1 year (unknown significance), Group B: 50% reduction by 6 months and 30% reduction by 1 year (unknown significance) 2. Hair Density - Group A: increased 23.6% (0.001), Group B: no significant change 3. Terminal Hair Density - Group A: increased 25.64% (0.001), Group B: no significant change 4. Vellus hair density - Group A: decreased 26.…	Patient self-assessment (0 = strongly disagree, 5 = strongly agree): improvement in bald spots, improvement in appearance, improvement in growth of hair, overall effectiveness, satisfaction; Adverse side effects: pain during injection,	Improvement in Bald Spots - Group A = 4, Group B = 2.5 Improvement in Appearance - Group A = 4.8, Group B = 3 Improvement in Growth of Hair - Group A = 4.4, Group B = 3.2 Overall Effectiveness of Treatment - Group A = 4, Group B = 3.8 Satisfaction with Treatment - Group A = 4.5, Group B = 3 Pain During Injection - Group A = 28%, Group B = 88% NO SIGNIFICANCE REPORTED FOR ALL ASSESSMENTS
Butt et al. 2020 (108)	Yes	Yes	N/A	None	Inclusion Criteria: 22 men and women 15 years or older with III-VI AGA (Norwood-Hamilton Scale for men) or I-III AGA (Ludwig Score for women) for past 12 months Exclusion criteria: patients with inflammatory diseases, infectious diseases, malignancy, autoimmune diseases, allergic diseases, pregnancy, anticoagulant use, chemotherapy within past 5 years	Trichoscan using epiluminescence microscopy with automatic digital image analysis 1. Hair Density (hair/cm^2) 2. Pull Test (20-60 hair grasped between thumb, index, middle fingers from base near scalp and firmly tugged, more than 10% pulled constitute positive pull test) 3. Physician 1 Global Assessment 4. Physician 2 Global Assessment	1. Hair Density - PRP: 21.51% increase (0.0227), SVF-PRP: 51.64% increase (0.006) 2. Pull Test - PRP: 34.01% decrease (unknown significance), SVF-PRP: 80.78% decrease (unknown significance); Study claims SVF-PRP gave superior physician assessment. However, Mann-Whitney U Test using data provided by paper suggests otherwise 3. Physician 1 Global Assessment - PRP: significant improvement (0.01828),…	Patient Global Assessment	Study claims SVF-PRP gave superior patient impressions. However, Mann-Whitney U Test using data provided by paper suggests otherwise Patient Global Assessment - PRP: significant improvement (0.00528), SVF-PRP: significant improvement (0.03846), PRP vs SVF-PRP: no significant difference.
Shapiro et al. (104)	Yes	Yes	Double	Half-head	Inclusion Criteria: 35 men and women aged 18-58 with III-V AGA (Norwood-Hamilton Scale for men) or I-II AGA (Ludwig Score for women), patients did not use pharmacologic AGA treatment for 3 months prior to enrollment Exclusion Criteria: patients with history of hair transplantation, facial cancer, hematologic or coagulation disorders, hemodynamic instability, acute infection, autoimmune disease, p…	Folliscope-assisted Photographic Assessment (Lead M, Seoul, South Korea) 1. Hair Density (hair/cm^2) 2. Mean Hair Diameter (um) 3. Investigator Global Assessment	1. Hair Density - PRP: 6.1% increase at 1 month (<0.05), 10.8% increase at 2 months (<0.05), 13.2% increase at 5 months (<0.05), Placebo: no change at 1 month, 9.3% increase at 2 months (<0.05), 10.38% increase at 4 months (<0.05), PRP vs Placebo: no significant differences at 1, 2, and 4 months 2. Hair Diameter - PRP: no significant change at 1 month and 2 months, 7.9% increase at 4 months (<0.0…	Patient Satisfaction and Self-Assessment	Patient Satisfaction and Self-Assessment - 45.8% patients noted discrete/noticeable change in scalp appearance, 86% patients would recommend treatment, 54.3% patients rated treatment moderately comfortable/tolerable.
Gressenberger et al. (105)	Yes	Yes	Single	None	Inclusion Criteria: 30 men aged 18-52 with > III AGA (Norwood-Hamilton Scale) Exclusion Criteria: previous or ongoing treatment with oral finasteride or topical minoxidil, previous hair transplantation, halignancy, hematologic disorders, thyroid dysfunction, malnutrition, other dermatological disorders.	Trichoscan Analysis 1. Median Hair Density (hair/cm^2) 2. Median Hair Diameter (um) 3. Independent Review of Visual Improvement	1. Median Hair Density - PRP: no significant change vs baseline at both follow up, Placebo: no significant change vs baseline at both follow up, PRP vs Placebo: no significant difference 2. Median Hair Diameter - PRP: no significant change vs baseline at both follow up, Placebo: no significant change vs baseline at both follow up, PRP v PLacebo: no significant difference 3. Independent Review of …	Subject Satisfaction Survey	Subject Satisfaction Survey - PRP vs Placebo: no significant differences in 4 categories (Pain, Clinical Outcome, Willingness to Pay, Recommendation of therapy).
Siah et al. (106)	Yes	Yes	Single	Half-head	Inclusion Criteria: 10 women and men (9:1) aged 20-55 years with clinically diagnosed AGA Exclusion Criteria: n/a	Folliscope-assisted Photographic Assessment (Lead M, Seoul, South Korea) 1. Platelet Enrichment 2. Hair Density Counting (unit n/a) 3. Hair Diameter (unit n/a)	1. Platelet Enrichment - 6.96 fold enrichment, correlation with platelet concentration in peripheral blood (0.017, r=0.53) 2. Hair Density Counting - PRP: 12.7% increase by 4 months (2 months post final treatment)(significance n/a), Placebo: 0.96% increase by 4 months (significance n/a), PRP vs Placebo: no significant difference 3. Hair Diameter - PRP: 16.22% decrease by 4 months (significance n/…	None	N/A
